# Supplementary material
Source: MDPI journal article supplement (https://www.mdpi.com/search?q=ijerph-15-01871)
Supplement: s001 [file ijerph-15-01871-s001.pdf]

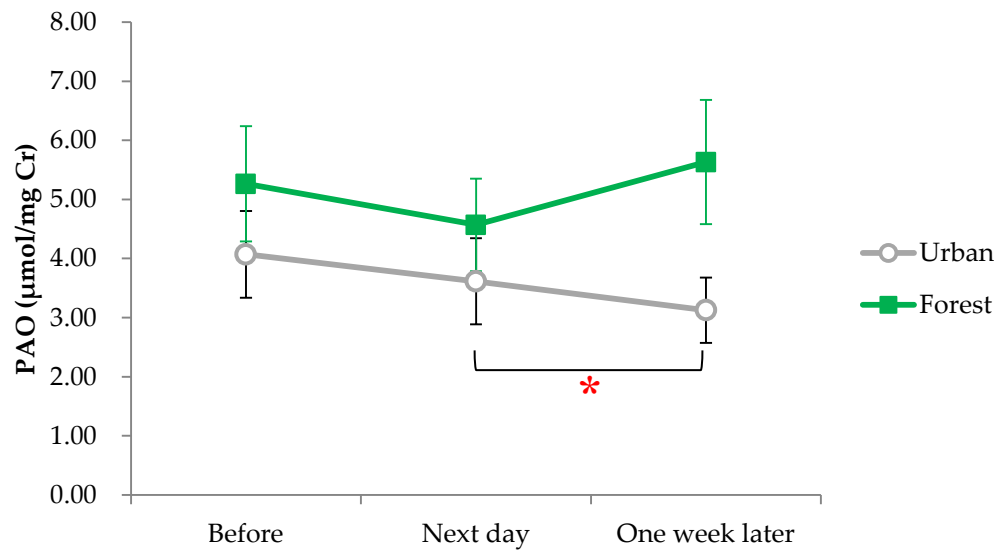

**Figure S1:** Urinary potential antioxidant level (PAO) before, the next day, and 1 week after forest or urban walks (\* $p < 0.1$  by a paired  $t$ -test: pre-urban walk vs. 1 week after the urban walk).
